# Supplementary material
Source: Springer Nature journal article supplement (https://www.springermedizin.de/resource/supplementary/12958_2013_1314_MOESM1_ESM.pdf/9566672)

Study nameStatistics for each studyOdds ratio and 95% CI

|                         | Odds ratio | Lower limit | Upper limit | Z-Value | p-Value |
|-------------------------|------------|-------------|-------------|---------|---------|
| Stovall et al., 1998    | 0,534      | 0,296       | 0,965       | -2,077  | 0,038   |
| Eldar-Geva et al., 1998 | 0,439      | 0,207       | 0,933       | -2,142  | 0,032   |
| Hart et al., 2001       | 0,585      | 0,335       | 1,019       | -1,892  | 0,058   |
| Surrey et al., 2001     | 0,691      | 0,378       | 1,263       | -1,201  | 0,230   |
| Gianaroli et al., 2005  | 0,768      | 0,464       | 1,272       | -1,025  | 0,305   |
| Girgin et al., 2005     | 0,499      | 0,274       | 0,910       | -2,267  | 0,023   |
| Khalaf et al., 2006     | 0,474      | 0,301       | 0,745       | -3,235  | 0,001   |
| Farhi et al., 1995      | 1,217      | 0,658       | 2,248       | 0,626   | 0,531   |
| Ramzy et al., 1998      | 1,240      | 0,628       | 2,449       | 0,619   | 0,536   |
| Jun et al., 2001        | 0,615      | 0,409       | 0,926       | -2,326  | 0,020   |
| Yarali et al., 2002     | 0,730      | 0,398       | 1,337       | -1,020  | 0,308   |
| Ng et al., 2002         | 1,128      | 0,637       | 2,000       | 0,414   | 0,679   |
| Check et al., 2002      | 0,579      | 0,279       | 1,201       | -1,468  | 0,142   |
| Oliveria et al., 2004   | 1,154      | 0,754       | 1,767       | 0,659   | 0,510   |
| Klatzky et al., 2007    | 0,744      | 0,465       | 1,190       | -1,234  | 0,217   |
| Bozdog et al., 2009     | 0,936      | 0,536       | 1,633       | -0,234  | 0,815   |
| Somigliana et al., 2011 | 1,233      | 0,653       | 2,326       | 0,646   | 0,519   |
| Guyen et al., 2013      | 0,525      | 0,284       | 0,969       | -2,060  | 0,039   |
|                         | 0,737      | 0,647       | 0,840       | -4,591  | 0,000   |

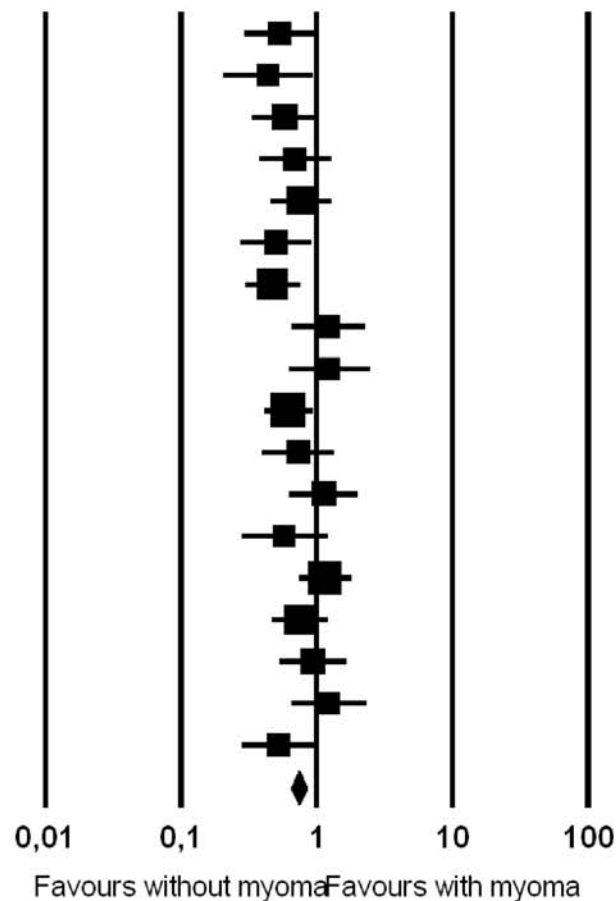

Supplement: MOESM1 [file 9566672]
